# Supplementary material for: Assessment of the efficacy of using taurine supplements to improve growth and feed utilization of juvenile starry flounder (Platichthys stellatus) given diets based on soy-protein
Source: PeerJ. 2021 Jan 11;9:e10597. doi: 10.7717/peerj.10597 (PMC7808265; doi:10.7717/peerj.10597)
Supplement: Supplemental Information 1 [file peerj-09-10597-s001.xlsx]

## Sheet: Growth performance
Group	initial weight	initial No	final No	final weight	AWG	SGR	SR(%)	FI	FCR	PER	average CF per group	average VSI per group	average HSI per group
T0	22.25	36	36	45.7472	23.4972	1.28712	100	1.02287	0.895918	2.42277	2.51	4.11	0.98
	22.22	36	36	43.9222	21.7	1.21666	100	0.997562	0.920333	2.35849	2.49	4.35	0.92
	22.25	36	36	46.2667	24.0167	1.30729	100	0.988712	0.853739	2.54246	2.56	4.38	0.86
T0.5	22.22	36	36	46.6472	24.425	1.32414	100	1.02292	0.870608	2.46936	2.84	4.02	1.05
	22.28	36	36	46.5889	24.3111	1.31745	100	0.993721	0.849685	2.53017	2.71	4.23	1.22
	22.19	36	36	47.0028	24.8083	1.33994	100	1.03591	0.872172	2.46493	2.69	4.16	0.97
T1	22.25	36	36	49.4444	27.1944	1.42591	100	1.03098	0.841245	2.58624	3.05	4.38	1.26
	22.22	36	36	50.3	28.0778	1.45877	100	1.03633	0.828469	2.62612	2.91	4.12	1.05
	22.28	36	35	51.2743	28.9965	1.48857	97.2222	1.047	0.847707	2.56652	3.08	4.15	1.02
T1.5	22.28	36	36	50.8444	28.5667	1.47354	100	1.06487	0.830482	2.60103	3.1	4.76	1.4
	22.25	36	36	51.7083	29.4583	1.50585	100	1.05789	0.809218	2.66938	2.96	4.41	1.08
	22.25	36	36	49.0972	26.8472	1.41332	100	1.06954	0.866004	2.49434	3.04	4.52	1.15
T2	22.25	36	36	49.9972	27.7472	1.44576	100	1.03963	0.83948	2.59846	2.86	4.61	1.39
	22.22	36	36	49.4417	27.2194	1.42804	100	1.03628	0.84611	2.5781	3.1	4.4	1.2
	22.28	36	36	51.7528	29.475	1.50516	100	1.05002	0.817873	2.66711	3.05	4.56	1.09
T2.5	22.25	36	36	50.0278	27.7778	1.44685	100	1.04222	0.841	2.59377	3.13	4.39	1.27
	22.22	36	36	49.9444	27.7222	1.4461	100	1.03141	0.832665	2.61973	3.06	4.51	1.34
	22.28	36	36	51.1389	28.8611	1.48385	100	1.05289	0.830606	2.62622	2.99	4.43	1.18

## Sheet: Nutritional composition
	Pooled liver(%)					Pooled muscle(%)					group	Asp	Ser	Glu	Gly	Ala	Cys	Tyr	Pro	Thr	Val	Met	Ile	Leu	Phe	Lys		His		Arg
Group	moisture	crude protein	crude fat	Ash	taurine	moisture	crude protein	crude fat	Ash	taurine	T0	9.85257	4.25971	16.3532	5.79124	6.6562	1.3059	3.13313	2.90245	4.33661	4.54818	1.65888	4.24333	7.19628	3.28556	7.46974		2.1253		5.95686
T0	66.24	12.42	16.36	1.56	183.02	73.9969	23.18	1.92437	0.440781	171.22	T0	10.3558	4.4681	17.1926	5.93047	6.91691	1.03871	3.26872	2.95841	4.53726	4.76294	1.6229	4.40895	7.53389	3.42342	7.83965		2.24042		6.20893
	67.15	12.56	16.89	1.49	187.92	74.5207	23.1	1.7661	0.446256	184.39	T0	9.08332	3.94788	15.0429	5.24918	6.05878	1.20217	2.89683	2.66084	3.99824	4.17144	1.76373	3.84839	6.5881	3.00785	6.89264	0.477265	2.05189	0.095032	5.49852	0.36016
	66.49	12.36	16.25	1.43	178.55	73.8512	23.53	1.64669	0.443671	197.7	T0.5	9.78796	4.22513	16.3045	5.57193	6.55564	1.36409	3.06488	2.80371	4.30976	4.53362	1.79977	4.16871	7.16625	3.24597	7.42378		2.11393		5.91682
T0.5	65.18	12.72	17.09	1.45	367.35	74.087	23.14	1.92638	0.435025	385.32	T0.5	10.1137	4.32432	16.8905	5.53189	6.80407	1.23862	3.36336	2.77459	4.42988	4.66921	1.66859	4.49085	7.70588	3.75496	8.10264		2.37055		6.02056
	66.02	12.53	17.11	1.38	388.25	74.0508	23.22	1.62205	0.435909	377.94	T0.5	9.469	4.07998	15.7439	5.29665	6.34725	1.21087	2.94522	2.64674	4.15097	4.38529	1.8254	4.00718	6.91372	3.16088	7.14304	0.49337	2.05251	0.168711	5.69524	0.166182
	65.28	12.88	16.73	1.45	360.16	74.6635	23.51	1.74728	0.43582	380.34	T1	9.78796	4.33797	16.1207	5.63745	6.62571	1.2194	3.24961	2.73728	4.3134	4.46628	1.83246	4.29884	7.37828	3.34404	7.84511		2.48521		5.91045
T1	65.35	12.71	17.56	1.43	451.25	74.3537	23.51	1.87766	1.87566	760.25	T1	10.0655	4.37346	16.5829	5.76303	6.82318	1.22486	3.23778	2.81099	4.42078	4.60915	1.76702	4.44626	7.63581	3.4405	8.01437		2.31504		6.09336
	64.86	12.86	16.82	1.24	440.16	74.6349	23.26	1.71889	1.71689	783.82	T1	9.02219	3.8311	14.8708	4.65602	5.95458	1.23896	3.06442	2.39967	3.93621	4.13458	1.77405	3.96805	6.8432	3.7856	7.29683	0.37508	2.20903	0.139329	5.35126	0.386625
	65.81	12.69	17.38	1.51	432.05	74.3773	23.42	1.85011	1.84811	763.33	T1.5	9.47765	4.04859	15.7667	5.37082	6.40731	1.35944	3.12403	2.6208	4.13322	4.34161	1.82033	4.20238	7.26362	3.31755	7.644		2.20584		5.75757
T1.5	64.36	12.95	17.15	1.53	441.25	74.6191	23.58	1.76823	1.76623	791.19	T1.5	9.24992	3.93985	15.3187	5.01342	6.18095	1.2992	3.09423	2.51023	4.03471	4.2381	1.79719	4.08522	7.05341	3.55158	7.47042		2.20743		5.55441
	65.18	12.78	17.51	1.25	470.84	74.7832	23.66	2.02707	2.02507	778.75	T1.5	9.196	3.9535	15.2616	5.26526	6.27354	1.47572	2.84375	2.6067	4.02948	4.29838	1.94992	4.03767	6.93102	3.65613	7.1658	0.242076	2.11211	0.0545806	5.60696	0.105449
	65.04	12.81	17.63	1.48	452.36	74.1117	23.32	1.83441	1.83241	783.56	T2	9.72244	4.18145	16.309	5.43452	6.50104	1.3377	3.28965	2.65447	4.25971	4.50996	2.16914	4.26699	7.40194	3.87043	7.82964		2.27773		5.86313
T2	64.52	12.86	17.86	1.35	456.32	74.6755	23.68	1.723	1.721	776.25	T2	9.76976	4.2042	16.2717	5.60287	6.7067	1.26998	3.20593	2.75366	4.26699	4.50086	1.78368	4.30885	7.41377	3.56952	7.8715		2.4115		5.91773
	64.75	12.84	17.82	1.48	449.25	74.8112	23.72	1.802	1.8	770.35	T2	9.63	4.38	15.82	5.62	6.48	1.443	3.11	2.83	4.21	4.35	1.92	4.22	7.18	3.85	7.41	0.255223	2.21	0.102538	6.08	0.112802
	65.12	13.04	17.25	1.42	440.12	74.2693	23.59	1.86776	1.86576	780.84	T2.5	9.65	4.29	15.93	5.28	6.61	1.38	3.09	2.5	4.1	4.52	1.83	4.18	7.3	3.98	7.25		2.45		5.36
T2.5	64.08	13.05	17.48	1.37	450.12	74.45	23.78	1.9841	1.9821	778.35	T2.5	9.48	4.08	16.27	5.57	6.78	1.44	2.85	2.78	4.08	4.62	2.02	4.4	7.21	3.52	7.64		2.2		5.92
	64.61	12.87	17.6	1.41	456.38	74.61	23.36	1.79426	1.79226	767.29	T2.5	9.8	4.03	16.44	5.48	6.42	1.29	3.14	2.66	4.32	4.45	1.91	4.25	7.43	3.71	7.38	0.198578	2.21	0.141539	6.01	0.352184
	63.94	12.98	18.09	1.44	453.76	74.29	23.89	1.782	1.78	786.16

## Sheet: Digestive enzymes
			Proximal intestine			Distal intestine
	pooled sample per group	Pepsin	Trypsin	Lipase	Amylase	Trypsin	Lipase	Amylase
	T0	2315.59	3414.15	28.24	642.85	1210.23	8.68	192.08
		2170.55	3296.44	31.52	622.76	1221.88	11.51	225.41
		2139.88	3351.91	28.83	633.22	1148.45	10.05	207.95
	T0.5	2175.54	3679.43	33.38	639.09	1256.56	9.57	227.69
		2319.94	3497.92	32.04	641.68	1131.11	10.87	215.84
		2087.52	3576.15	31.26	627.19	1186.23	10.37	195.25
	T1	2409.78	3756.11	35.51	619.06	1345.41	10.14	248.66
		2211.98	3673.25	33.62	648.29	1411.74	10.86	202.69
		2348.36	3601.32	34.14	641.5	1216.28	9.33	214.14
	T1.5	2714.14	3690.24	34.85	623.41	1398.12	10.3525	237.28
		2491.2	3871.54	36.5	635.93	1505.31	9.3842	217.86
		2445.03	3705.68	35.69	657.15	1462.63	10.6124	204.73
	T2	2579.32	3806.08	37.33	650.22	1518.44	10.2023	219.57
		2442.51	3718.72	35.72	632.57	1627.53	9.15316	184.01
		2500.8	3724.17	36.16	622.76	1335.82	9.82131	195.4
	T2.5	2514.68	3775.52	37.73	652.73	1637.26	11.0735	220.72
		2487.12	3623.15	36.19	646.15	1402.75	11.4352	192.29
		2395.67	3657.79	36.09	631.41	1531.51	10.1415	197.93

## Sheet: Metabolic enzymes
pooled sample per group	AST	ALT	FAS	HL	GCS	GK	PC	CSD
T0	680.25	386.32	102.35	129.15	1.56	118.35	120.12	0.245
	701.04	358.25	116.28	138.62	1.83	90.64	132.18	0.23
	716.45	377.35	106.74	133.64	2.52	107.69	131.51	0.265
T0.5	740.14	469.32	111.06	109.88	2.19	96.37	136.25	0.22
	727.69	484.01	121.68	148.65	2.37	111.26	145.85	0.255
	743.15	478.88	119.34	127.25	2.02	85.49	127.19	0.225
T1	803.85	484.25	138.24	126.34	2.81	126.34	144.37	0.22
	820.28	528.13	145.37	134.16	2.53	101.49	138.59	0.245
	818.74	507.95	131.52	135.27	2.44	106.82	131.65	0.24
T1.5	831.11	531.02	142.29	142.37	2.22	127.76	132.59	0.195
	816.35	532.74	130.89	128.59	2.03	134.61	135.64	0.23
	833.33	540.02	137.51	123.68	2.41	125.89	140.19	0.215
T2	823.28	538.15	118.65	126.27	2.08	129.98	130.26	0.2
	840.53	553.61	133.19	125.69	2.35	131.64	120.69	0.18
	828.69	540.12	124.86	139.28	2.11	118.25	123.65	0.24
T2.5	834.44	558.14	126.59	145.67	1.96	129.24	118.36	0.175
	825.58	556.25	120.83	126.32	2.25	135.38	123.65	0.2
	837.13	541.21	135.79	138.74	2.27	119.23	122.67	0.195

## Sheet: Serum oxidation resistance
pooled sample per group	Serum
	SOD		GSH-Px		CAT		MDA
T0	3.88		41.37		175.57		0.935
	4.27		37.49		188.95		1.312
	4.06	0.195192	38.66	1.99028	181.18	6.719	0.986	0.204534
T0.5	4.23		43.23		185.36		1.12545
	4.39		40.81		170.65		0.854556
	4.38	0.0896289	43.1	1.36121	178.25	7.35636	1.09122	0.147516
T1	4.52		43.72		191.76		0.956245
	4.48		42.08		175.01		1.06455
	4.61	0.0665833	40.89	1.42095	183.07	8.37697	0.882456	0.0915918
T1.5	4.58		45.51		167.29		0.725146
	4.47		43.36		183.72		0.923456
	4.66	0.0953939	43.75	1.14544	187.43	10.7186	0.92145	0.11392
T2	4.53		53.12		190.34		0.889472
	4.48		49.53		162.82		0.92458
	4.75	0.143643	50.68	1.83322	170.91	14.144	0.724545	0.106808
T2.5	4.58		52.13		202.59		0.956462
	4.5		49.55		185.48		0.81245
	4.69	0.0953939	49.06	1.64931	192.93	8.57875	0.722548	0.117995
